# Supplementary material
Source: HighWire-hosted journal article supplement (http://d2538ggaoe6cji.cloudfront.net/highwire/filestream/47220/field_highwire_adjunct_files/5/136531-6.pdf)
Supplement: 136531-6.pdf [file 136531-6.pdf]

**S6 Table. Experimental treatment conditions**

| <b>Dataset</b> | <b>Treatment Start</b> | <b>Dosage</b> | <b>Interval</b> | <b>Duration</b> | <b># of Doses</b> |
|----------------|------------------------|---------------|-----------------|-----------------|-------------------|
| Roland         | Day 26                 | 10 mg/kg      | 2x per wk       | 3 weeks         | 6                 |
| Zibara         | Day 0                  | 10 mg/kg      | 2x per wk       | 4 weeks         | 8                 |
| Tan            | Day 14                 | 5 mg/kg       | 2x per wk       | 2 weeks         | 2                 |
| Volk (2008)    | Day 10                 | 4 mg/kg       | 2x per wk       | 5.5 weeks       | 11                |
| Volk (2011a)   | Day 19                 | 4 mg/kg       | 2x per wk       | 6 weeks         | 12                |
| Volk (2011b)   | Day 21                 | 4 mg/kg       | 2x per wk       | 3 weeks         | 6                 |
